# Supplementary material
Source: MDPI journal article supplement (https://www.mdpi.com/2076-3298/7/10/90)
Supplement: s1 [file s1]

## Langford *et al.* Supplementary data: References for Table 4

### <sup>2</sup> ODT references:

- (1) Reference [34] of article
- (2) Sollner, Schieberle. *J. Agric. Food Chem.* **2009**, 57, 4319-4327
- (3) Kniebes, Chisholm, Stubbs. *Gas (Rome)* **1969**, 19, 211-217
- (4) Patte. Le codage de la stimulation olfactive – clarifications et mises au point. Thesis, Lyon, France, 1978; Patte, Punter. *Chem. Senses Flavour* **1979**, 4, 351-354
- (5) Nagy. *J. Air Waste Manage. Assoc.* **1991**, 41, 1360-1362
- (6) Greenman, Duffield, Spencer, Rosenberg, Corry, Saad, Lenton, Majerus, Nachnani, El-Maaytah. *J. Dent. Res.* **2004**, 83, 81-85
- (7) Estimated from related compounds as literature data appears inconsistent
- (8) Logtenberg. Division for Physical and Chemical Technology, TNO, Netherlands, unpublished report, 1978
- (9) Bedborough, Trott. Warren Spring Laboratory, Stevenage, UK, Report LR 299 (AP), 1979
- (10) von Ranson, Belitz. *Z. Lebensm. Unters. Forsch.* **1992**, 195, 515-522
- (11) Laska, Ringh. *Perception & Psychophysics* **2010**, 73, 806-812
- (12) Lindell. A study of odour and taste from food packaging board analysed by chromatographic techniques and sensory evaluation. Thesis. 1991
- (13) Hall, Andersson. *Lebensm. Wiss. Technol.* **1983**, 16, 354-361
- (14) Gasser, Grosch. *Z. Lebensm. Unters. Forsch.* **1990**, 190, 3-8
- (15) Cometto-Muniz, Abraham. *Behav. Brain Res.* **2009**, 201, 207-215
- (16) Savenhed, Boren, Brimvall. *J. Chrom.* **1985**, 328, 219-231
- (17) Amoores, in Theimer E.T. (Ed.), 'Fragrance Chemistry', Academic Press, New York, 1982, 27-76
- (18) Pelosi, Viti. *Chem. Senses Flavour* **1978**, 3, 331-337
- (19) van Anrooij, Thesis, Utrecht, Netherlands, 1939
- (20) Punter. *Chem Senses* **1983**, 7, 213-235
- (21) Kendall, Leonardos, Rubin. Report C-68988, Arthur D. Little Inc., Cambridge, USA, 1968

### <sup>3</sup> Odor note references:

- (I) Reference [1] of article
- (II) Reference [2] of article
- (III) The Good Scents Company, <http://www.thegoodscentscompany.com/> (accessed September 11, 2019)
- (IV) Reference [4] of article
- (V) Acree T. and Arn H. 'Flavornet and Human Odor Space', [www.flavornet.org](http://www.flavornet.org) (accessed September 4, 2019)
- (VI) United States Agency for Toxic Substances and Disease Registry, 'Dichlorobenzenes. 4 Chemical and Physical Information', <https://www.atsdr.cdc.gov/ToxProfiles/tp10-c4.pdf> (accessed September 11, 2019)
- (VII) United States Agency for Toxic Substances and Disease Registry, 'Chlorophenols. 1. Public Health Statement' <https://www.atsdr.cdc.gov/toxprofiles/tp107-c1.pdf> (accessed September 11, 2019)

### <sup>4</sup> SIFT-MS library data references

- (A) Williams, Adams, Babcock. *Int. J. Mass Spectrom.* **1998**, 172, 149-159

- (B) Spanel, Smith. *Int. J. Mass Spectrom.* **1998**, 176, 167-176
- (C) Wang, Smith, Spanel. *Int. J. Mass Spectrom.* **2004**, 233, 245-251
- (D) Syft Technologies compound library, 2012
- (E) Technologies compound library, 2013
- (F) Spanel, Smith. *Int. J. Mass Spectrom.* **1998**, 176, 203-211
- (G) Adams, Smith, Paulson. *J. Chem. Phys.* **1980**, 72, 288-297
- (H) Wang, Spanel, Smith. *Int. J. Mass Spectrom.* **2004**, 237, 167-174
- (I) Spanel, Smith. *Int. J. Mass Spectrom. Ion Proc.* **1998**, 172, 137-147
- (J) Smith, Chippendale, Spanel, *Int. J. Mass Spectrom.* **2011**, 303, 81-89
- (K) Spanel, Ji, Smith. *Int. J. Mass Spectrom. Ion Proc.* **1997**, 165/166, 25-37
- (L) Spanel, Van Doren, Smith. *Int. J. Mass Spectrom.* **2002**, 213, 163-176
- (M) Michel, Schoon, Amelynck, Guimbaud, Catoire, Arijs. *Int. J. Mass Spectrom.* **2005**, 244, 50-59
- (N) Syft Technologies compound library, 2010
- (O) Syft Technologies compound library, 2014
- (P) Syft Technologies compound library, 2004
- (Q) Smith, Wang, Spanel. *Rapid Commun. Mass Spectrom.* **2003**, 17, 2655-2660
- (R) Spanel, Smith, *Int. J. Mass Spectrom. Ion. Proc.* **1997**, 167/168, 375-388
- (S) Wang, Spanel, Smith. *Int. J. Mass Spectrom.* **2004**, 239, 139-146
- (T) Syft Technologies compound library, 2019
- (U) Wang, Spanel, Smith. *Int. J. Mass Spectrom.* **2003**, 228, 117-126
- (V) Syft Technologies compound library, 2005
- (W) Syft Technologies compound library, 2008
- (X) Ross. *Rapid Commun. Mass Spectrom.* **2011**, 25, 162-168
- (Y) Spanel, Smith. *Int. J. Mass Spectrom.* **1998**, 181, 1-10
